# Supplementary material for: The Role of Healthy Lifestyle in the Implementation of Regressing Suboptimal Health Status among College Students in China: A Nested Case-Control Study
Source: PubMed Central journal article supplement (PMC5369076; doi:10.3390/ijerph14030240), 2017-02-28
Supplement: ijerph-14-00240-s001.pdf [file ijerph-14-00240-s001.pdf]

# Supplementary Materials: The Role of Healthy Lifestyle in the Implementation of Regressing Suboptimal Health Status among College Students in China: A Nested Case–Control Study

Jieyu Chen, Hongjie Xiang, Pingping Jiang, Lin Yu, Yuan Jing, Fei Li, Shengwei Wu, Xiuqiong Fu, Yanyan Liu, Hiuyee Kwan, Ren Luo, Xiaoshan Zhao and Xiaomin Sun

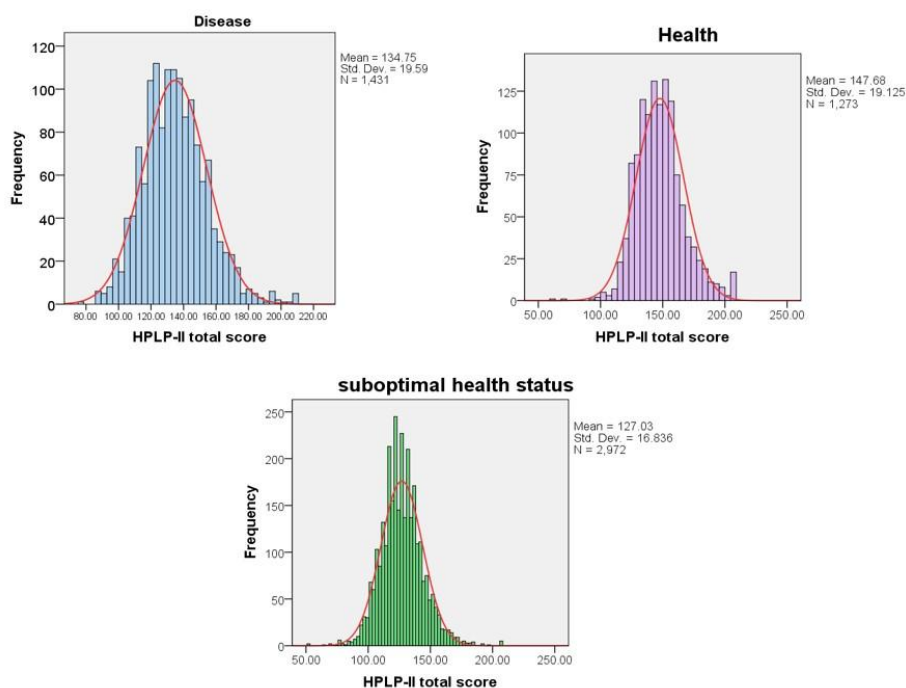

Figure S1. The health-promoting lifestyle (HPLP-II) total score of different health status.

Table S1. Health status compared with health-promoting lifestyle using one-way ANOVA.

|                            | Health status                     |                                |                                   | One-way ANOVA |         |                      |
|----------------------------|-----------------------------------|--------------------------------|-----------------------------------|---------------|---------|----------------------|
|                            | Group 1: Health (n = 1273, 22.4%) | Group 2: SHS (n = 2972, 52.4%) | Group 3: Disease (n = 1431.25.2%) | F value       | p-value | Multiple comparisons |
| Spiritual growth           | 29.58 (3.90)                      | 25.02(4.37)                    | 26.76 (4.86)                      | 480.10        | 0.000   | G3 < G2 < G1 *       |
| Health responsibility      | 20.37 (4.95)                      | 17.25 (3.76)                   | 18.39 (4.37)                      | 245.08        | 0.000   | G2 < G3 < G1 *       |
| Sports and exercise        | 19.92 (4.81)                      | 16.71 (4.14)                   | 17.51 (4.47)                      | 240.61        | 0.000   | G2 < G3 < G1 *       |
| Nutrition                  | 24.64 (4.50)                      | 21.93 (4.16)                   | 23.04 (4.36)                      | 179.46        | 0.000   | G2 < G3 < G1 *       |
| Interpersonal relationship | 28.51 (3.62)                      | 24.88 (3.78)                   | 26.54 (4.14)                      | 410.75        | 0.000   | G2 < G3 < G1*        |
| Stress management          | 24.67 (3.49)                      | 21.24 (3.36)                   | 22.49 (3.80)                      | 432.71        | 0.000   | G2 < G3 < G1 *       |
| Total score                | 147.68 (19.13)                    | 127.03 (16.84)                 | 134.75 (19.60)                    | 584.11        | 0.000   | G2 < G3 < G1 *       |

Data presented as mean (SD). ANOVA indicates analysis of variance. Bonferroni was used in the multiple comparisons; \*p <0.001 (Significant after Bonferroni correction for post-hoc analysis.)

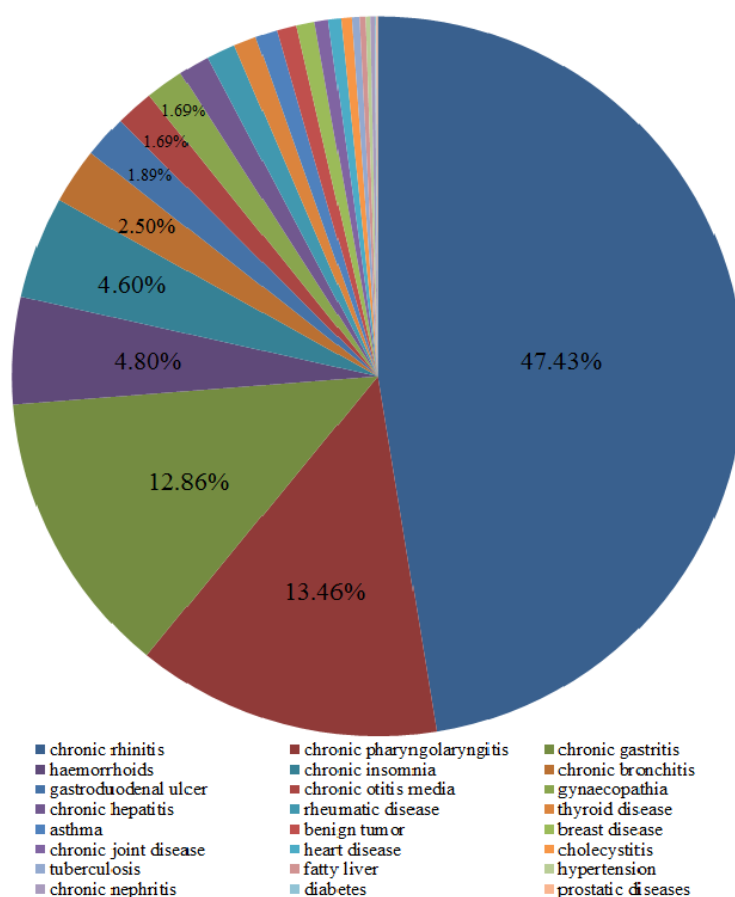

**Figure S2.** Distribution of disease at baseline in the study cohort (n = 1431). The reported major diseases were related to the respiratory, digestive systems and endocrine or autoimmune systems, such as chronic rhinitis (47.43%), chronic pharyngolaryngitis (13.46%), chronic gastritis (12.86%), haemorrhoids (4.80%) and chronic insomnia (4.60%).

**Table S2.** Distribution of disease at baseline in the study cohort (n = 1431).

| Disease                    | Count | Percentage |
|----------------------------|-------|------------|
| chronic rhinitis           | 701   | 47.43%     |
| chronic pharyngolaryngitis | 199   | 13.46%     |
| chronic gastritis          | 190   | 12.86%     |
| haemorrhoids               | 71    | 4.80%      |
| chronic insomnia           | 68    | 4.60%      |
| chronic bronchitis         | 37    | 2.50%      |
| gastroduodenal ulcer       | 28    | 1.89%      |
| chronic otitis media       | 25    | 1.69%      |
| gynaecopathia              | 25    | 1.69%      |
| chronic hepatitis          | 20    | 1.35%      |
| rheumatic disease          | 19    | 1.29%      |
| thyroid disease            | 15    | 1.01%      |
| asthma                     | 14    | 0.95%      |
| benign tumor               | 13    | 0.88%      |
| breast disease             | 12    | 0.82%      |
| chronic joint disease      | 9     | 0.61%      |
| heart disease              | 8     | 0.54%      |
| cholecystitis              | 7     | 0.47%      |
| tuberculosis               | 5     | 0.34%      |
| fatty liver                | 4     | 0.27%      |
| hypertension               | 3     | 0.20%      |
| chronic nephritis          | 3     | 0.20%      |
| diabetes                   | 1     | 0.07%      |
| prostatic diseases         | 1     | 0.07%      |

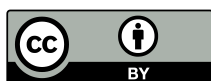

© 2017 by the authors. Submitted for possible open access publication under the terms and conditions of the Creative Commons Attribution (CC-BY) license (<http://creativecommons.org/licenses/by/4.0/>).
